# Supplementary material for: Sdy-1 Executes Antitumor Activity in HepG2 and HeLa Cancer Cells by Inhibiting the Wnt/β-Catenin Signaling Pathway
Source: MDPI journal article supplement (doi:10.3390/md20020125), 2022-02-05
Supplement: s1 [file s1]

# **Sdy-1 executes antitumor activity in HepG2 and Hela cancer cells by inhibiting the Wnt/ $\beta$ -catenin signaling pathway**

**Mengyu Sun <sup>1,‡</sup>, Dongdong Zhou <sup>1,‡</sup>, Jingwan Wu<sup>1</sup>, Jing Zhou <sup>2</sup> and Jing Xu <sup>1,\*</sup>**

<sup>1</sup> One Health Institute, School of Chemical Engineering and Technology, Hainan University, Haikou 570228, China; summer@hainanu.edu.cn (M. S.); dongdongchoy@hainanu.edu.cn (D. Z.); 2021110817000019@hainanu.edu.cn (J. W.)

<sup>2</sup> School of Life Sciences, Hainan University, Haikou 570228, China; 993725@hainanu.edu.cn (J. Z.)

\* Correspondence: happyjing3@hainanu.edu.cn (J. X.)

‡ These authors contributed equally to this work.

## Contents

|                                                                   |   |
|-------------------------------------------------------------------|---|
| <b>Figure S1.</b> $^1\text{H}$ -NMR of Sdy-1 .....                | 3 |
| <b>Figure S2.</b> $^{13}\text{C}$ -NMR of Sdy-1 .....             | 3 |
| <b>Figure S3.</b> DEPT of Sdy-1 .....                             | 4 |
| <b>Figure S4.</b> $^1\text{H}$ - $^1\text{H}$ COSY of Sdy-1 ..... | 4 |
| <b>Figure S5.</b> HMQC of Sdy-1 .....                             | 5 |
| <b>Figure S6.</b> HMBC of Sdy-1 .....                             | 5 |
| <b>Figure S7.</b> NOESY of Sdy-1 .....                            | 6 |
| <b>Figure S8.</b> ESI-MS of Sdy-1.....                            | 6 |

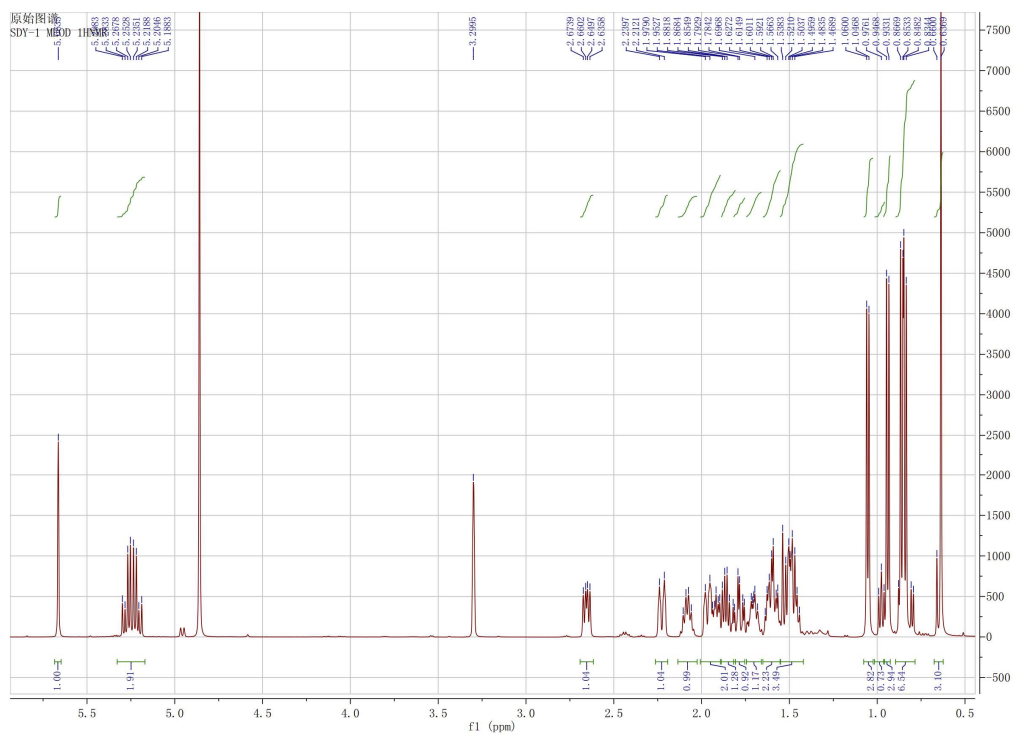

**Figure S1.** <sup>1</sup>H-NMR of Sdy-1

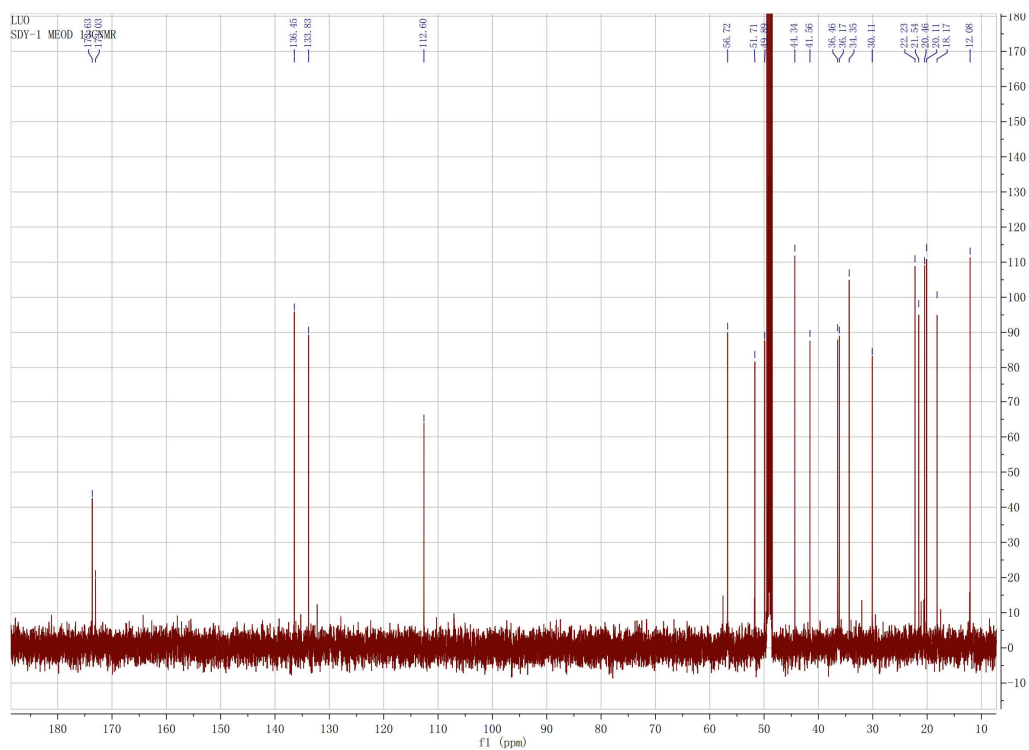

**Figure S2.** <sup>13</sup>C-NMR of Sdy-1

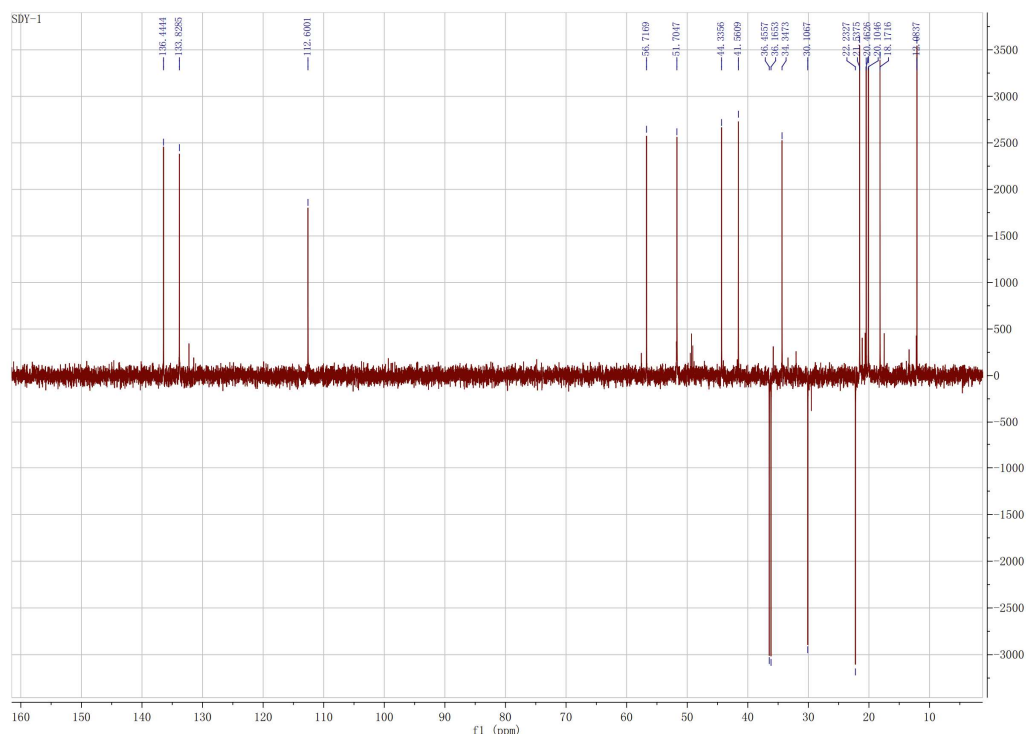

**Figure S3.** DEPT of Sdy-1

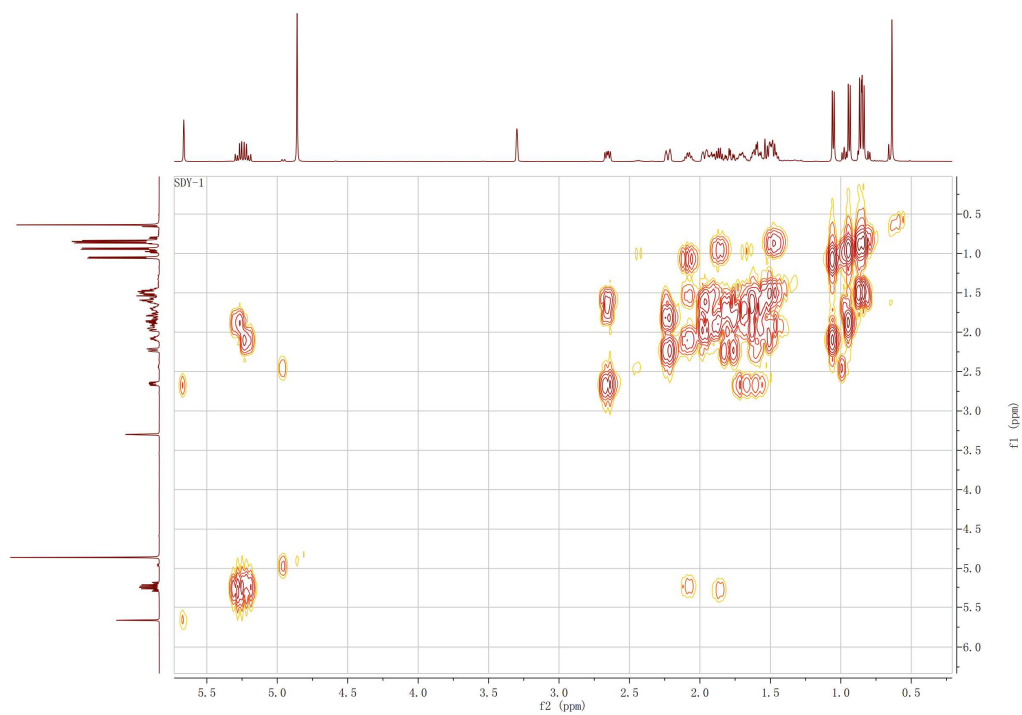

**Figure S4.**  $^1\text{H}$ - $^1\text{H}$  COSY of Sdy-1

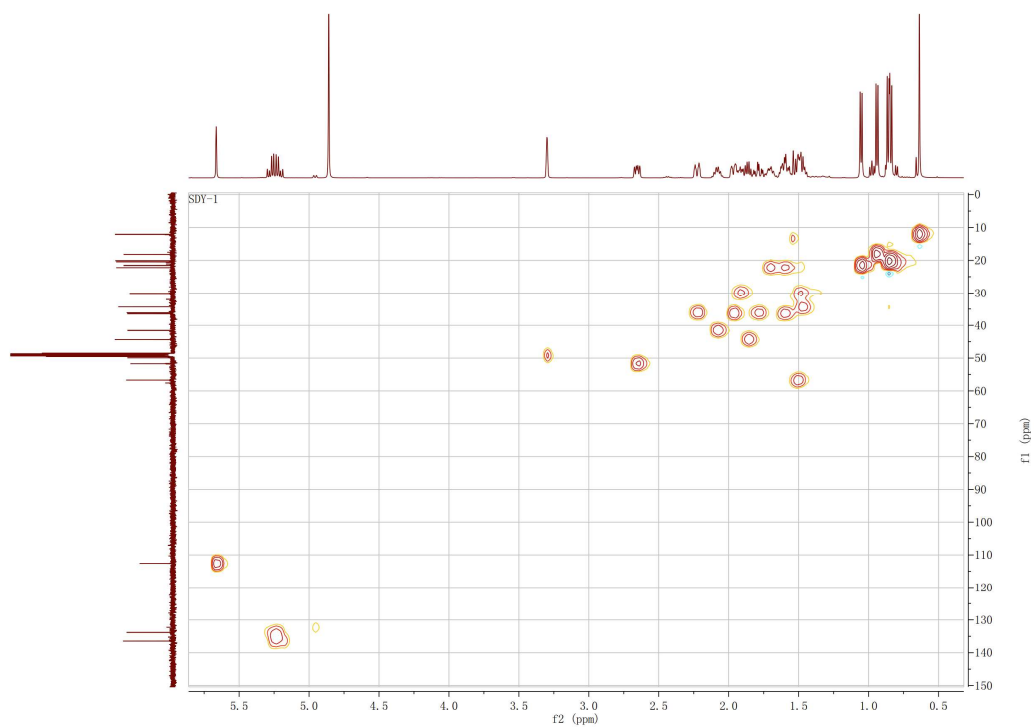

**Figure S5. HMQC of Sdy-1**

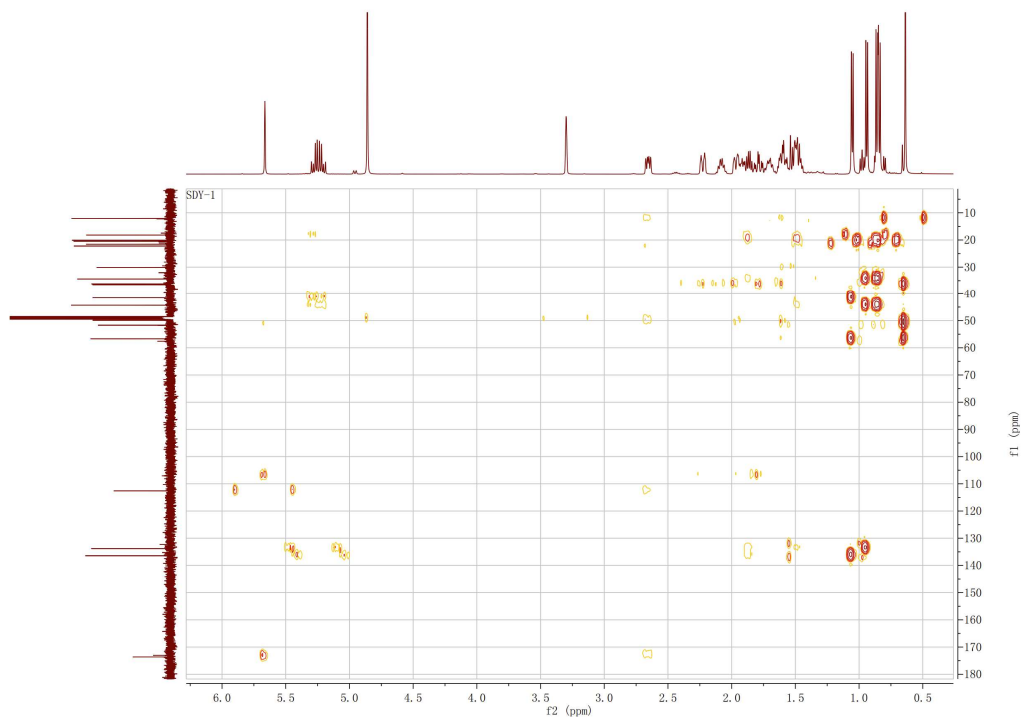

**Figure S6. HMBC of Sdy-1**

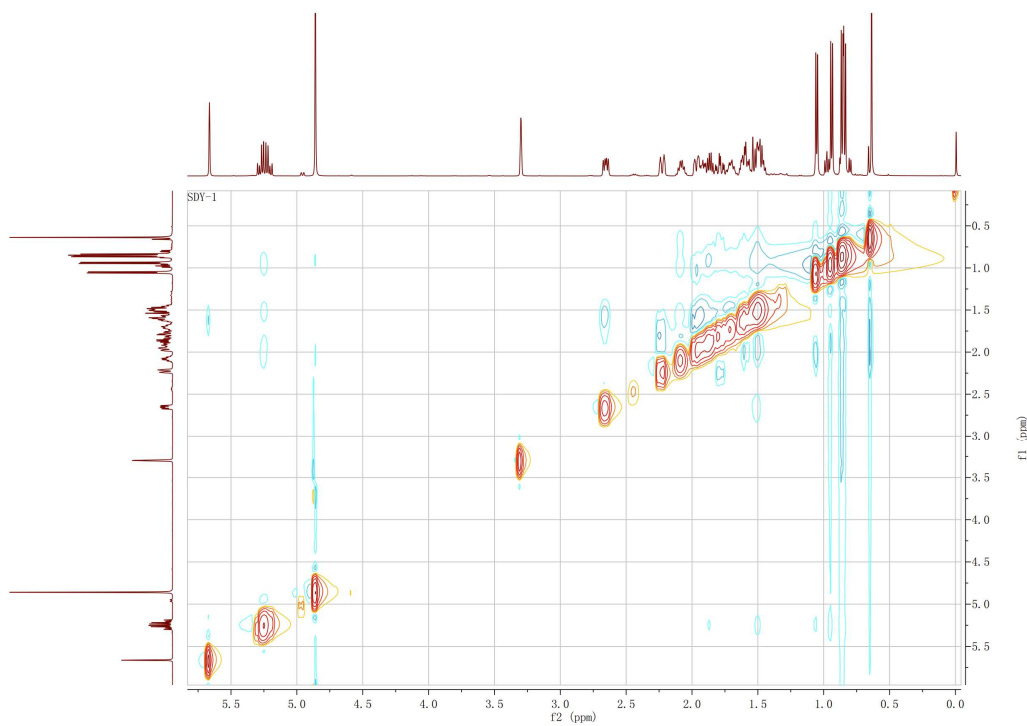

**Figure S7. NOESY of Sdy-1**

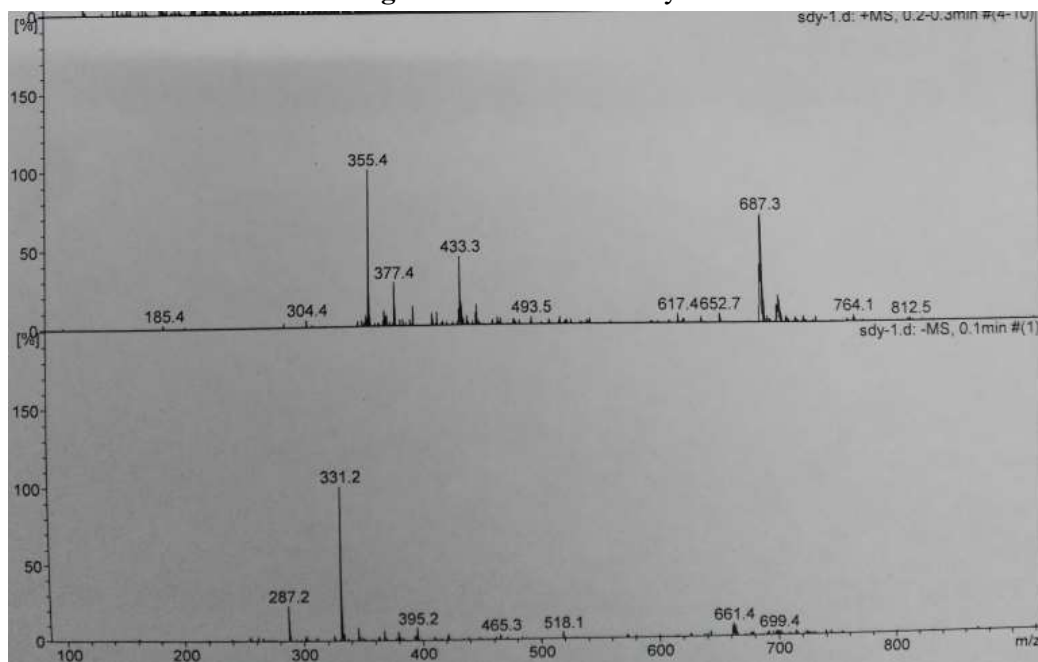

**Figure S8. ESI-MS of Sdy-1**
